# Supplementary material for: Reducing SO2 Doses in Red Wines by Using Grape Stem Extracts as Antioxidants
Source: PubMed Central journal article supplement (PMC7599755; doi:10.3390/biom10101369), 2020-09-25
Supplement: biomolecules-10-01369-s001.pdf [file biomolecules-10-01369-s001.pdf]

# Supplementary Material

## A. Statistical analyses of antioxidant capacity data

**Table 1.** Estimations of the hierarchical linear model for the ABTS results.

|              | <b>Control<sup>a</sup></b> | <b>Vinetan</b> | <b>Grape Stem Extract</b> |
|--------------|----------------------------|----------------|---------------------------|
| <b>M</b>     | 7.15***                    | -1.91***       | -2.37***                  |
| <b>50%AF</b> | 20.98***                   | 2.14**         | -1.48                     |
| <b>AF</b>    | 22.86***                   | -0.32          | -2.58                     |
| <b>MLF</b>   | 19.84***                   | 1.35           | -1.04                     |
| <b>B</b>     | 13.85***                   | -1.54***       | -1.52**                   |
| <b>YB</b>    | 13.56***                   | -0.45          | -1.46                     |

<sup>a</sup> Intercept.

*p*-value: \*\*\* <0.001; \*\*<0.025; \*<0.05.

**Table 2.** Estimations of the hierarchical linear model for the DPPH results.

|              | <b>Control<sup>a</sup></b> | <b>Vinetan</b> | <b>Grape Stem Extract</b> |
|--------------|----------------------------|----------------|---------------------------|
| <b>M</b>     | 2.83***                    | -0.52***       | -0.87***                  |
| <b>50%AF</b> | 6.95***                    | -0.63*         | 0.31                      |
| <b>AF</b>    | 6.53***                    | -0.2           | -0.46***                  |
| <b>MLF</b>   | 6.77***                    | -0.25          | -0.14                     |
| <b>B</b>     | 6.48***                    | -0.54***       | -0.34**                   |
| <b>YB</b>    | 6.64***                    | -0.18          | -0.37                     |

<sup>a</sup> Intercept.

*p*-value: \*\*\* <0.001; \*\*<0.025; \*<0.05.

**Table 3.** Estimations of the hierarchical linear model for the FRAP results.

|              | <b>Control<sup>a</sup></b> | <b>Vinetan</b> | <b>Grape Stem Extract</b> |
|--------------|----------------------------|----------------|---------------------------|
| <b>M</b>     | 4.67***                    | -1.72***       | -1.85***                  |
| <b>50%AF</b> | 13.10***                   | 1.01*          | -1.06**                   |
| <b>AF</b>    | 13.12***                   | -1.59***       | -1.59***                  |
| <b>MLF</b>   | 10.97***                   | 1.35           | 1.08                      |
| <b>B</b>     | 8.92***                    | -2.21***       | -1.14**                   |
| <b>YB</b>    | 7.71***                    | 0.97           | -0.42                     |

<sup>a</sup> Intercept.

*p*-value: \*\*\* <0.001; \*\*<0.025; \*<0.05.

## B. Statistical analyses of sensory analyses data

**Table 4.** Estimations of the linear model for the results of the sensory analysis of wines before bottling.

|                  | <b>Control</b> | <b>Vinetan</b> | <b>Grape Stem Extract</b> |
|------------------|----------------|----------------|---------------------------|
| <b>Visual</b>    | 10.2***        | 1***           | 1.39***                   |
| <b>Olfactory</b> | 24.57***       | -0.33          | -0.11                     |
| <b>Mouthfeel</b> | 36.1***        | 0.27           | 0.89                      |
| <b>General</b>   | 9.57***        | 0.11           | 0.17                      |
| <b>Total</b>     | 80.46***       | 0.43           | 0.06                      |

<sup>a</sup> Intercept.

*p*-value: \*\*\* <0.001; \*\*<0.01; \*<0.05.

**Table 5.** Estimations of the linear model for the results of the sensory analysis of wines after for 12 months in bottle.

|                  | <b>Control</b> | <b>Vinetan</b> | <b>Grape Stem Extract</b> |
|------------------|----------------|----------------|---------------------------|
| <b>Visual</b>    | 11.29***       | 0.57           | 1.07*                     |
| <b>Olfactory</b> | 23.07***       | 1.5*           | 2.79***                   |
| <b>Mouthfeel</b> | 34.5***        | 0.5            | 0.5                       |
| <b>General</b>   | 9.1***         | 0.14           | 0.07                      |
| <b>Total</b>     | 77.95***       | 2.71           | 4.43*                     |

<sup>a</sup> Intercept.

*p*-value: \*\*\* <0.001; \*\*<0.01; \*<0.05.

It can be observed that linear model considers significant some coefficient whereas Tuckey analysis (Tables 5 and 6) does not, this is because Tukey analysis is a global comparative test for the means of the three treatments.
